# Supplementary material for: Unsupervised explorative data analysis of normal human leukocytes and BCR/ABL positive leukemic cells mid-infrared spectra
Source: Royal Society of Chemistry journal article supplement (doi:10.1039/c5an00148j), 2015-01-01
Supplement: c5an00148j1.pdf [file c5an00148j1.pdf]

| forward (FW) and reverse (RV) primers                                     | target gene                    | sequence                                                              | amplicon size (bp) |
|---------------------------------------------------------------------------|--------------------------------|-----------------------------------------------------------------------|--------------------|
| <i>h</i> PTPRG FW<br><i>h</i> PTPRG RV                                    | <i>human</i><br><i>PTPRG</i>   | 5'-GTTTCAAGCTAATACCACTCG-3'<br>5'-TGGAACAAATGAGAATGGG-3'              | 155                |
| <i>h</i> BACT FW<br><i>h</i> BACT RV                                      | <i>human</i><br><i>β-actin</i> | 5'-TGACCCAGATCATGTTTGAG-3'<br>5'-CTTCTCCTTAATGTCACGCAC-3'             | 290                |
| BCR/ABL FW<br>BCR/ABL RV                                                  | <i>Bcr/Abl</i>                 | 5'-GATGCTGACCAACTCGTGTG-3'<br>5'-AGCAGATACTCAGCGGCATT-3'              | 411-486            |
| BCR/ABL FW<br>BCR/ABL RV                                                  | <i>Bcr/Abl</i>                 | 5'-GTTCTGATCTCCTCTGACTATGAGCGTG-3'<br>5'-TGTGATTATAGCCTAAGACCCGGAG-3' | 411-486            |
| (external round nested PCR)<br><i>m</i> PTPRGex FW<br><i>m</i> PTPRGex RV | <i>mouse</i><br><i>Ptpng</i>   | 5'-ATCCTATTATCCACGGGCTG-3'<br>5'-TGTAATGTCTTCTCCTTCTCGTC-3'           | 483                |
| (internal round nested PCR)<br><i>m</i> PTPRGinFW<br><i>m</i> PTPRGinRV   | <i>mouse</i><br><i>PTPRG</i>   | 5'-GTACCTGAGAAATAACTTCCGAC-3'<br>5'-AGAGCTGCAAACCTTAGAGG-3'           | 144                |
| <i>m</i> βACT FW<br><i>m</i> βACT RV                                      | <i>mouse</i><br><i>β-actin</i> | 5'-GTACCTGAGAAATAACTTCCGAC-3'<br>5'-GAGCAATGATCTTGATCTTCATGG-3'       | 145                |

Table 1. Forward (FW) and reverse (RV) primers used for RT-PCR of *BCR/ABL*, human (*h*) and mouse (*m*) *PTPRG* and human and mouse beta actin (*BACT*) genes.

model 1: 1560-1485,1190-1140, 985-875  $\text{cm}^{-1}$

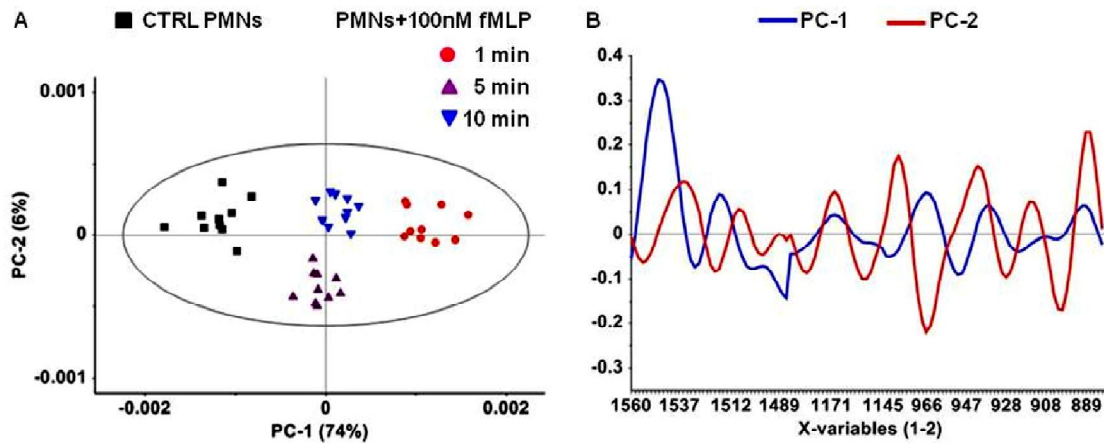

model 2: 1700-1480  $\text{cm}^{-1}$

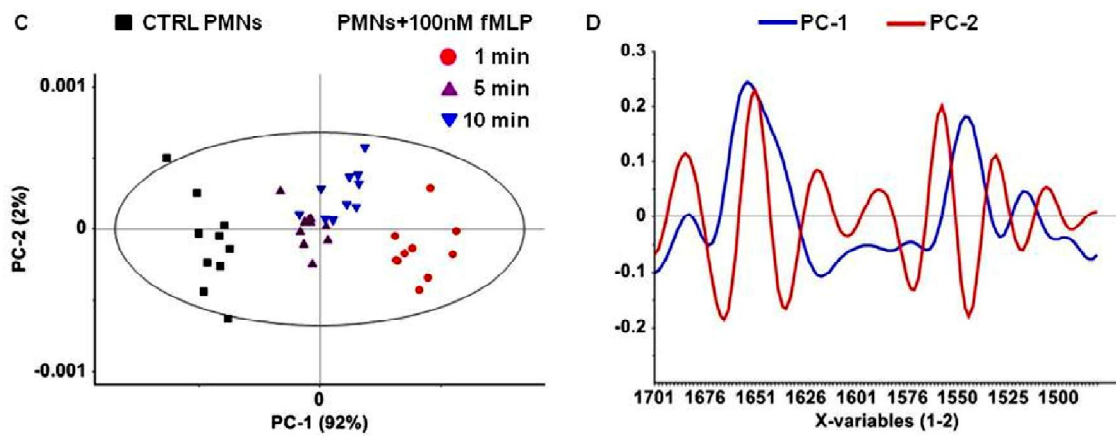

Figure S1. MicroFTIR performed with the conventional IR source (global) and principal component analysis (PCA) with models 1 (A-B) and 2 (C-D), respectively. The dataset comprises the spectra of PMNs exposed to 100 nM fMLP for 1 min (red dot), 5 min (violet triangle) and 10 min (blue inverted triangle), and the spectra of non stimulated CTRL PMNs (black box). Each symbol represents the average spectrum mediating IR signals from 10-12 cells spread over an area of 30x30  $\mu\text{m}^2$  in sizes. Grey ellipse delimits 95% confidence interval. Statistics are available in supplementary material S5.

model 2: 1700-1480  $\text{cm}^{-1}$

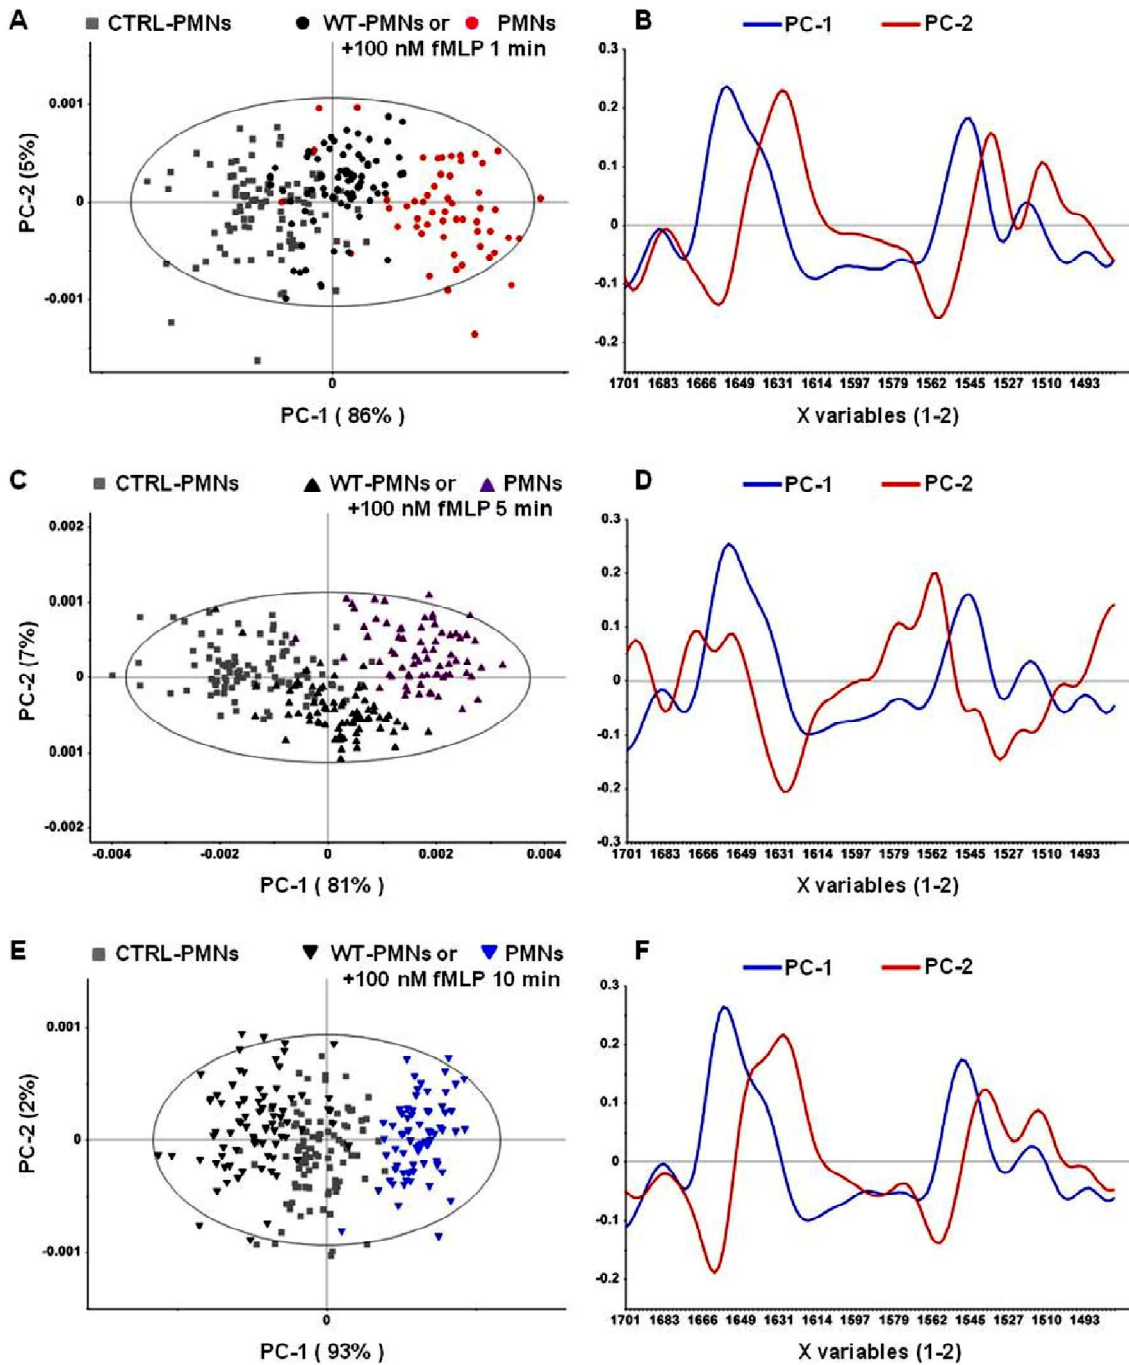

Figure S2. SR microFTIR and principal component analysis (PCA) with the model 2 (1700-1480  $\text{cm}^{-1}$ ). The dataset composes of spectra of neutrophil leukocytes pre-incubated with 100 nM wortmannin (WT-PMNs) the specific and irreversible inhibitor of phosphoinositol 3 phosphate kinase (PI3K) activity and stimulated with 100 nM fMLP (black symbols), the spectra of PMNs stimulated with fMLP without the inhibition of PI3K (red, violet, and blue symbols) and the spectra of non stimulated CTRL PMNs (grey box). fMLP stimulation for 1, 5, and 10 min is indicated by dot, triangle and inverted triangles, respectively. Grey ellipse delimits 95% confidence interval. Statistics are available in supplementary material S5.

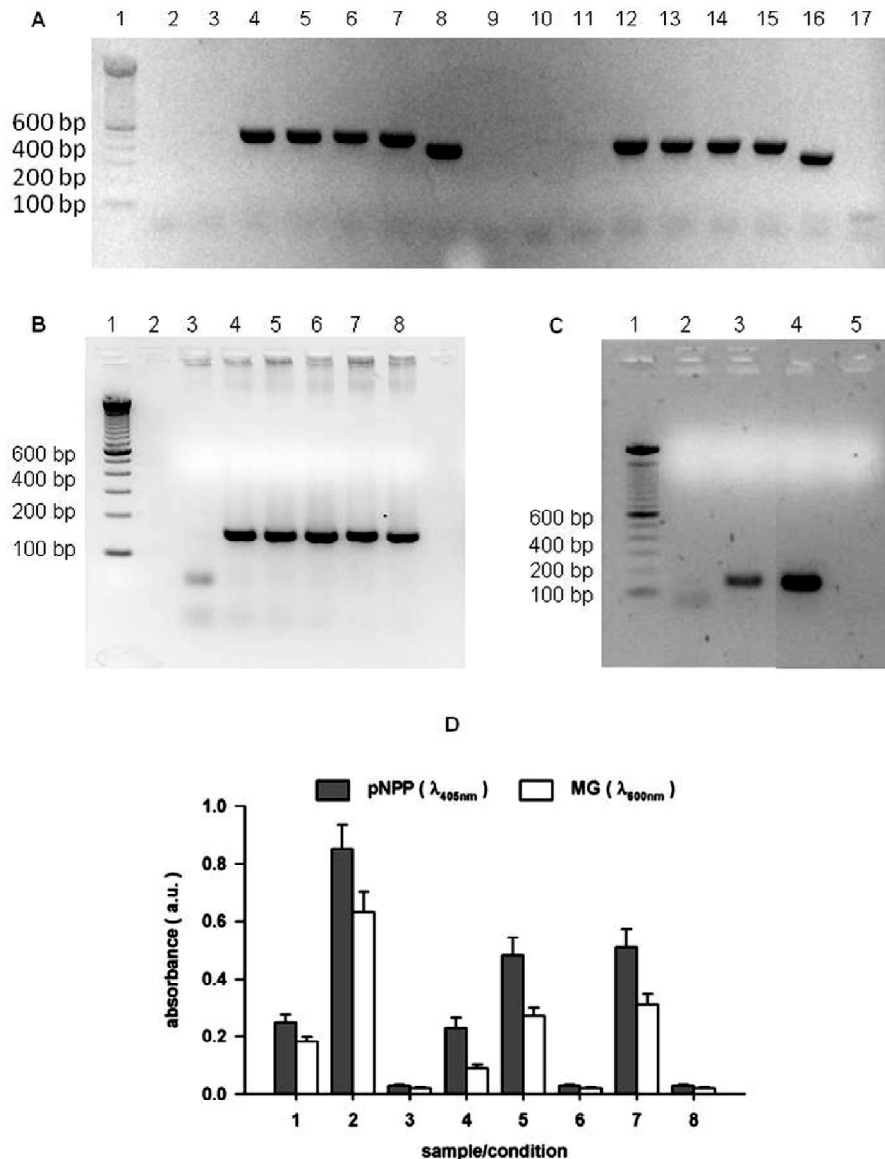

Figure S3. The presence of p210<sup>BCR/ABL</sup> (A) and of mouse (B) or human (C) *PTPRG* cDNAs checked in Ba/F3 and in K562 cells sub-clones by polymerase chain reaction (RT-PCR). A (p210<sup>BCR/ABL</sup>) lanes: base pair (100bp) ladder (1); Ba/F3#PAR (2,3, 10, and 11); Ba/F3 transfected with p210<sup>BCR/ABL</sup> cDNA (Ba/F3#WT, 4 and 12); K562#MK (5,13), K562#G1 (6,14), K562#DA (7,15); BCR/ABL positive CTRL MEG-01 leukemia cell line (8 and 16); H<sub>2</sub>O (9 and 17), respectively. B (*mPTPRG*) lanes: bp ladder (1); H<sub>2</sub>O (2); H<sub>2</sub>O PCR ms nest483 F/R (3); Ba/F3#PAR (4 and 5); Ba/F3#WT (6 and 7); CTRL mouse F317L cells (8). C (*hPTPRG*) lanes: bp ladder (1); K562#MK (2); K562#DA (3); K562#G1 (4); H<sub>2</sub>O (5), respectively. D: protein phosphatase activity (mean ± SD of 2 independent experiments) determined by p-Nitrophenyl Phosphate (pNPP, grey bars) and malachite green (MG) assays, respectively. Sample/condition: K562#MK (1), K562#G1 (2), K562#G1 + 0.2 mM Na<sub>3</sub>VO<sub>4</sub> (3); K562#DA (4), Ba/F3#PAR (5), Ba/F3#PAR + 0.2 mM Na<sub>3</sub>VO<sub>4</sub> (6); Ba/F3#WT (7), and Ba/F3#WT + 0.2 mM Na<sub>3</sub>VO<sub>4</sub> cell lysates (50μL sample adjusted to 1 mg total protein/mL cell lysate + 150 μL 50 mM Tris buffer pH 7.4, containing 1 mM EDTA and 1 mM DTT), respectively. In the MG assay 150 μM ENDpYINASL phosphopeptide was used as a substrate for PTP activity.

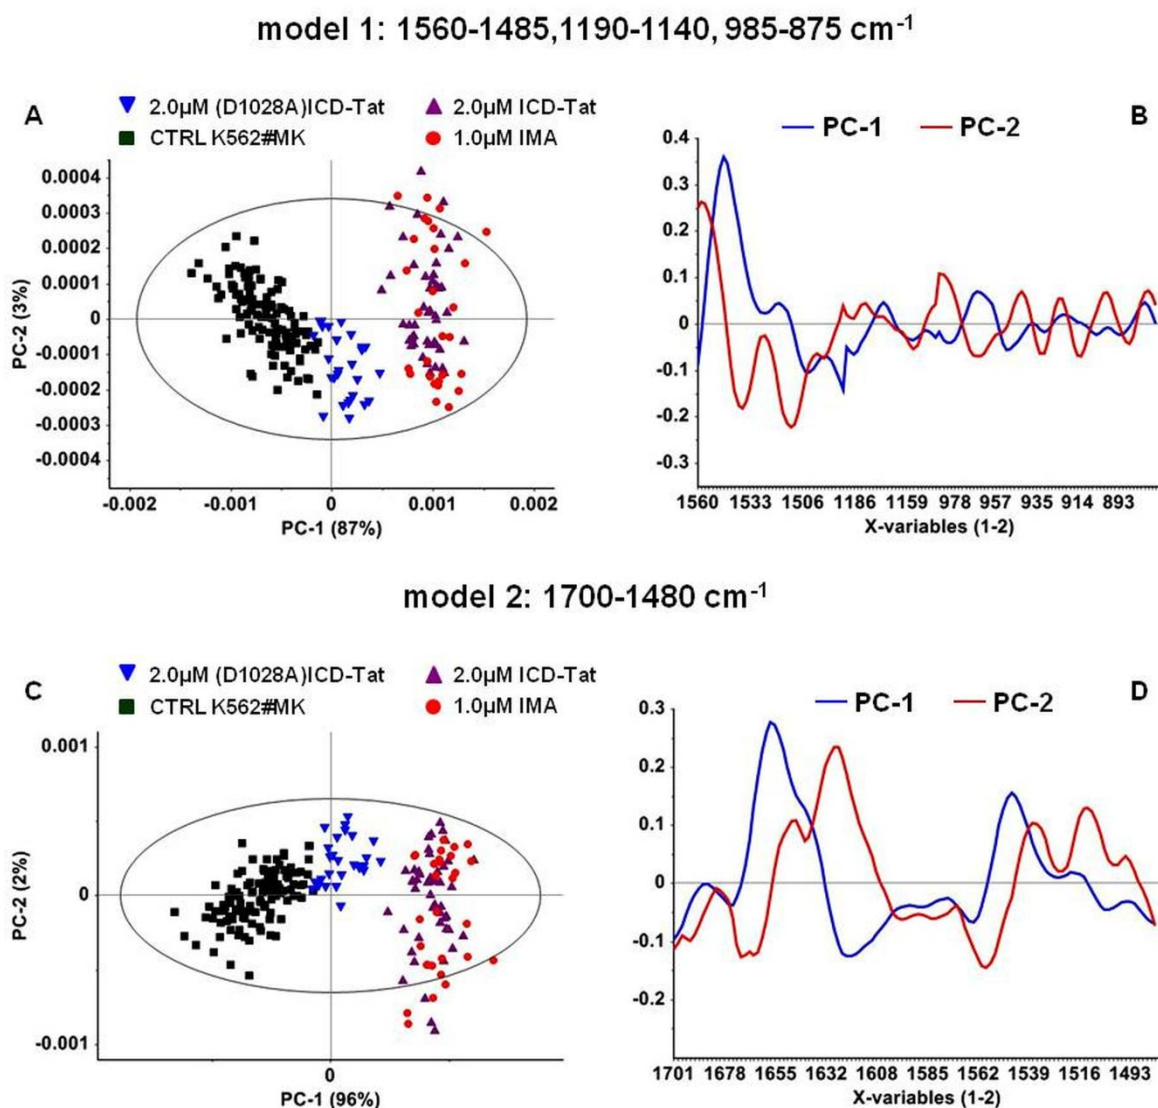

Figure S4. MicroFTIR performed with the conventional IR source (global) and PCA with models 1 (A-B) and 2 (C-D) applied to explore K562#MK cells exposed to different experimental conditions. Each symbol average IR signals from 10-12 cells spread within  $30 \times 30 \mu\text{m}^2$  spot areas. CTRL K562#MK (black box), and K562#MK samples exposed for 24 hours to 2.0  $\mu\text{M}$  ICD-Tat (violet triangle) or to 2.0  $\mu\text{M}$  (D1028A)ICD-Tat (blue inverted triangle) recombinant proteins, or to 1.0  $\mu\text{M}$  imatinib mesylate (IMA) (red dot) are shown. Grey ellipse delimits 95% confidence interval. Statistics are available in supplementary material S5. S5. Statistics performed on PCA data.

| Figure 1 AB, model 1800-875 cm <sup>-1</sup>                           |                                                        |                            |                     |                              |                   |
|------------------------------------------------------------------------|--------------------------------------------------------|----------------------------|---------------------|------------------------------|-------------------|
| variables                                                              | type of test                                           | result                     | comparison          | significance level<br>P<0.05 |                   |
| PC-1                                                                   | Kruskal-Wallis One Way<br>ANOVA on Ranks               | H = 171.568,<br>(P=<0.001) | 1 min fMLP vs. CTRL | YES                          |                   |
|                                                                        |                                                        |                            | 5 min fMLP vs CTRL  | YES                          |                   |
|                                                                        | All Pairwise Multiple<br>Comparison<br>(Dunn's Method) |                            |                     | 10 min fMLP vs CTRL          | YES               |
|                                                                        |                                                        |                            |                     | 1 min fMLP vs. 5 min fMLP    | NO <sup>(a)</sup> |
|                                                                        |                                                        |                            |                     | 1 min fMLP vs. 10 min fMLP   | NO <sup>(b)</sup> |
|                                                                        |                                                        |                            |                     | 5 min fMLP vs. 10 min fMLP   | NO                |
| PC-2                                                                   | Kruskal-Wallis One Way<br>ANOVA on Ranks               | H = 221.591,<br>(P=<0.001) | 1 min fMLP vs CTRL  | NO                           |                   |
|                                                                        |                                                        |                            | 5 min fMLP vs CTRL  | YES                          |                   |
|                                                                        | All Pairwise Multiple<br>Comparison<br>(Dunn's Method) |                            |                     | 10 min fMLP vs CTRL          | YES               |
|                                                                        |                                                        |                            |                     | 1 min fMLP vs. 5 min fMLP    | YES               |
|                                                                        |                                                        |                            |                     | 1 min fMLP vs. 10 min fMLP   | YES               |
|                                                                        |                                                        |                            |                     | 5 min fMLP vs. 10 min fMLP   | YES               |
| Figure 1 CD, model 1 (1560-1485, 1190-1140, 985-875 cm <sup>-1</sup> ) |                                                        |                            |                     |                              |                   |
| PC-1                                                                   | Kruskal-Wallis One Way<br>ANOVA on Ranks               | H = 182.147,<br>(P=<0.001) |                     | P=<0.001                     |                   |
|                                                                        |                                                        |                            | 1 min fMLP vs. CTRL | YES                          |                   |
|                                                                        | All Pairwise Multiple<br>Comparison<br>(Dunn's Method) |                            |                     | 5 min fMLP vs CTRL           | YES               |
|                                                                        |                                                        |                            |                     | 10 min fMLP vs CTRL          | YES               |
|                                                                        |                                                        |                            |                     | 1 min fMLP vs. 5 min fMLP    | YES               |
|                                                                        |                                                        |                            |                     | 1 min fMLP vs. 10 min fMLP   | NO <sup>(c)</sup> |
| PC-2                                                                   | Kruskal-Wallis One Way<br>ANOVA on Ranks               | H = 234.088,<br>(P=<0.001) |                     | P=<0.001                     |                   |
|                                                                        |                                                        |                            | 5 min fMLP vs CTRL  | YES                          |                   |
|                                                                        | All Pairwise Multiple<br>Comparison<br>(Dunn's Method) |                            |                     | 10 min fMLP vs CTRL          | YES               |
|                                                                        |                                                        |                            |                     | 1 min fMLP vs. 5 min fMLP    | YES               |
|                                                                        |                                                        |                            |                     | 1 min fMLP vs. 10 min fMLP   | YES               |
|                                                                        |                                                        |                            |                     | 5 min fMLP vs. 10 min fMLP   | YES               |
| Figure 1 EF, model 2 (1700-1480 cm <sup>-1</sup> )                     |                                                        |                            |                     |                              |                   |
| PC-1                                                                   | Kruskal-Wallis One Way<br>ANOVA on Ranks               | H = 200.912,<br>(P=<0.001) | 1 min fMLP vs. CTRL | YES                          |                   |
|                                                                        |                                                        |                            | 5 min fMLP vs CTRL  | YES                          |                   |
|                                                                        | All Pairwise Multiple<br>Comparison<br>(Dunn's Method) |                            |                     | 10 min fMLP vs CTRL          | YES               |
|                                                                        |                                                        |                            |                     | 1 min fMLP vs. 5 min fMLP    | YES               |
|                                                                        |                                                        |                            |                     | 1 min fMLP vs. 10 min fMLP   | YES               |
|                                                                        |                                                        |                            |                     | 5 min fMLP vs. 10 min fMLP   | NO <sup>(d)</sup> |
| PC-3                                                                   | Kruskal-Wallis One Way<br>ANOVA on Ranks               | H = 151.194,<br>(P=<0.001) | 1 min fMLP vs. CTRL | NO                           |                   |
|                                                                        |                                                        |                            | 5 min fMLP vs CTRL  | YES                          |                   |
|                                                                        | All Pairwise Multiple<br>Comparison<br>(Dunn's Method) |                            |                     | 10 min fMLP vs CTRL          | YES               |
|                                                                        |                                                        |                            |                     | 1 min fMLP vs. 5 min fMLP    | YES               |
|                                                                        |                                                        |                            |                     | 1 min fMLP vs. 10 min fMLP   | YES               |
|                                                                        |                                                        |                            |                     | 5 min fMLP vs. 10 min fMLP   | YES               |

<sup>(a)</sup> Mann-Whitney Rank Sum Test: T = 4853, P = 0.009

<sup>(b)</sup> Mann-Whitney Rank Sum Test: T = 4537, P = 0.042

<sup>(c)</sup> Mann-Whitney Rank Sum Test: T = 4471, P = 0.042

<sup>(d)</sup> t-test: t = 2.019, P = 0.045

Figure S5. Statistics performed on PCA data

| <b>Figure S1 AB, model 1 ( 1560-1485, 1190-1140, 985-874 cm<sup>-1</sup> )</b> |                                                              |                                 |                          |                              |           |
|--------------------------------------------------------------------------------|--------------------------------------------------------------|---------------------------------|--------------------------|------------------------------|-----------|
| variables                                                                      | Type of test                                                 | result                          | comparison               | significance level<br>P<0.05 |           |
| <b>PC-1</b>                                                                    | Kruskal-Wallis One<br>Way ANOVA                              | F = 206.842,<br>(P<0.001)       | 1 min fMLP vs. CTRL      | YES                          |           |
|                                                                                |                                                              |                                 | 5 min fMLP vs CTRL       | YES                          |           |
|                                                                                | All Pairwise Multiple<br>Comparison (Holm-<br>Sidak method)  |                                 |                          | 10 min fMLP vs CTRL          | YES       |
|                                                                                |                                                              |                                 |                          | 1 min fMLP vs. 5 min fMLP    | YES       |
|                                                                                |                                                              |                                 |                          | 1 min fMLP vs. 10 min fMLP   | YES       |
|                                                                                |                                                              |                                 |                          | 5 min fMLP vs. 10 min fMLP   | YES       |
|                                                                                | <b>PC-2</b>                                                  | Kruskal-Wallis One<br>Way ANOVA | F = 46.756,<br>(P<0.001) | 1 min fMLP vs. CTRL          | NO        |
| 5 min fMLP vs CTRL                                                             |                                                              |                                 |                          | YES                          |           |
| All Pairwise Multiple<br>Comparison (Holm-<br>Sidak method)                    |                                                              |                                 |                          | 10 min fMLP vs CTRL          | NO        |
|                                                                                |                                                              |                                 |                          | 1 min fMLP vs. 5 min fMLP    | YES       |
|                                                                                |                                                              |                                 |                          | 1 min fMLP vs. 10 min fMLP   | NO        |
|                                                                                |                                                              |                                 |                          | 5 min fMLP vs. 10 min fMLP   | YES       |
| <b>Figure S1 CD, model 2 ( 1700-1480 cm<sup>-1</sup> )</b>                     |                                                              |                                 |                          |                              |           |
| <b>PC-1</b>                                                                    | Kruskal-Wallis One<br>Way ANOVA                              |                                 |                          | P=<0.001                     |           |
|                                                                                |                                                              |                                 | 1 min fMLP vs. CTRL      | P<0.05                       |           |
|                                                                                | All Pairwise Multiple<br>Comparison (Holm-<br>Sidak method): |                                 |                          | 5 min fMLP vs CTRL           | P<0.05    |
|                                                                                |                                                              |                                 |                          | 10 min fMLP vs CTRL          | P=0.970   |
|                                                                                |                                                              |                                 |                          | 1 min fMLP vs. 5 min fMLP    | P<0.05    |
|                                                                                |                                                              |                                 |                          | 1 min fMLP vs. 10 min fMLP   | P<0.05    |
|                                                                                |                                                              |                                 |                          | 5 min fMLP vs. 10 min fMLP   | P<0.05    |
| <b>PC-2</b>                                                                    | Kruskal-Wallis One<br>Way ANOVA on Ranks                     |                                 |                          | P=0.243                      |           |
|                                                                                |                                                              |                                 | 1 min fMLP vs. CTRL      | P = 0.710                    |           |
|                                                                                | t-test on the means                                          |                                 |                          | 5 min fMLP vs CTRL           | P = 0.352 |
|                                                                                |                                                              |                                 |                          | 10 min fMLP vs CTRL          | P=0.980   |
|                                                                                |                                                              |                                 |                          | 1 min fMLP vs. 5 min fMLP    | P=0.059   |
|                                                                                |                                                              |                                 |                          | 1 min fMLP vs. 10 min fMLP   | P=0.710   |
|                                                                                |                                                              |                                 |                          | 5 min fMLP vs. 10 min fMLP   | P=0.352   |

Figure S5. Statistics performed on PCA data

| <b>Figure 2 AB (1 min fMLP stimulation), model 1 ( 1560-1485, 1190-1140, 985-875 cm<sup>-1</sup> )</b>  |                                                                 |                                                          |                           |
|---------------------------------------------------------------------------------------------------------|-----------------------------------------------------------------|----------------------------------------------------------|---------------------------|
| <b>variables</b>                                                                                        | <b>Type of test</b>                                             | <b>Comparison</b>                                        | <b>significance level</b> |
| <b>PC-1</b>                                                                                             | Kruskal-Wallis One Way ANOVA on Ranks                           |                                                          | P=<0.001                  |
|                                                                                                         |                                                                 | PMNs +100 nM fMLP 1 min vs. CTRL PMNs                    | P<0.05                    |
|                                                                                                         | All Pairwise Multiple Comparison (Dunn's Method)                | WT-PMNs +100 nM fMLP 1 min vs. CTRL PMNs                 | P<0.05                    |
|                                                                                                         |                                                                 | PMNs +100 nM fMLP 1 min vs. WT-PMNs +100 nM fMLP 1 min   | P<0.05                    |
| <b>PC-2</b>                                                                                             | Kruskal-Wallis One Way ANOVA                                    |                                                          | P=<0.001                  |
|                                                                                                         |                                                                 | PMNs +100 nM fMLP 1 min vs. CTRL PMNs                    | P<0.05                    |
|                                                                                                         | All Pairwise Multiple Comparison Procedures (Holm-Sidak method) | WT-PMNs +100 nM fMLP 1 min vs. CTRL PMNs                 | P<0.05                    |
|                                                                                                         |                                                                 | PMNs +100 nM fMLP 1 min vs. WT-PMNs +100 nM fMLP 1 min   | P<0.05                    |
| <b>Figure 2 CD (5 min fMLP stimulation), model 1 ( 1560-1485, 1190-1140, 985-875 cm<sup>-1</sup> )</b>  |                                                                 |                                                          |                           |
| <b>PC-1</b>                                                                                             | Kruskal-Wallis One Way ANOVA                                    |                                                          | P=<0.001                  |
|                                                                                                         |                                                                 | PMNs +100 nM fMLP 5 min vs. CTRL PMNs                    | P<0.05                    |
|                                                                                                         | All Pairwise Multiple Comparison Procedures (Holm-Sidak method) | WT-PMNs +100 nM fMLP 5 min vs. CTRL PMNs                 | P<0.05                    |
|                                                                                                         |                                                                 | PMNs +100 nM fMLP 5 min vs. WT-PMNs +100 nM fMLP 5 min   | P<0.05                    |
| <b>PC-2</b>                                                                                             | Kruskal-Wallis One Way ANOVA on Ranks                           |                                                          | P=<0.001                  |
|                                                                                                         |                                                                 | PMNs +100 nM fMLP 5 min vs. CTRL PMNs                    | P<0.05                    |
|                                                                                                         | All Pairwise Multiple Comparison (Dunn's Method)                | WT-PMNs +100 nM fMLP 5 min vs. CTRL PMNs                 | P=0.498                   |
|                                                                                                         |                                                                 | PMNs +100 nM fMLP 1 min vs. WT-PMNs +100 nM fMLP 5 min   | P<0.05                    |
| <b>Figure 2 EF (10 min fMLP stimulation), model 1 ( 1560-1485, 1190-1140, 985-875 cm<sup>-1</sup> )</b> |                                                                 |                                                          |                           |
| <b>PC-1</b>                                                                                             | Kruskal-Wallis One Way ANOVA on Ranks                           |                                                          | P=<0.001                  |
|                                                                                                         |                                                                 | PMNs +100 nM fMLP 10 min vs. CTRL PMNs                   | P<0.05                    |
|                                                                                                         | All Pairwise Multiple Comparison (Dunn's Method)                | WT-PMNs +100 nM fMLP 10 min vs. CTRL PMNs                | P<0.05                    |
|                                                                                                         |                                                                 | PMNs +100 nM fMLP 10 min vs. WT-PMNs +100 nM fMLP 10 min | P<0.05                    |
| <b>PC-2</b>                                                                                             | Kruskal-Wallis One Way ANOVA                                    |                                                          | P=<0.001                  |
|                                                                                                         |                                                                 | PMNs +100 nM fMLP 10 min vs. CTRL PMNs                   | P<0.05                    |
|                                                                                                         | All Pairwise Multiple Comparison Procedures (Holm-Sidak method) | WT-PMNs +100 nM fMLP 10 min vs. CTRL PMNs                | P<0.05                    |
|                                                                                                         |                                                                 | PMNs +100 nM fMLP 10 min vs. WT-PMNs +100 nM fMLP 10 min | P<0.05                    |

Figure S5. Statistics performed on PCA data



| <b>Figure S2 AB (1 min fMLP stimulation), model 2 ( 1700-1480 cm<sup>-1</sup> )</b>  |                                                                       |                                                             |                           |
|--------------------------------------------------------------------------------------|-----------------------------------------------------------------------|-------------------------------------------------------------|---------------------------|
| <b>variables</b>                                                                     | <b>Type of test</b>                                                   | <b>comparison</b>                                           | <b>significance level</b> |
| <b>PC-1</b>                                                                          | Kruskal-Wallis One Way<br>ANOVA on Ranks                              |                                                             | P=<0.001                  |
|                                                                                      |                                                                       | PMNs +100 nM fMLP 1 min vs.<br>CTRL PMNs                    | P<0.05                    |
|                                                                                      | All Pairwise Multiple<br>Comparison<br>(Dunn's Method)                | WT-PMNs +100 nM fMLP 1 min vs.<br>CTRL PMNs                 | P<0.05                    |
|                                                                                      |                                                                       | PMNs +100 nM fMLP 1 min vs.<br>WT-PMNs +100 nM fMLP 1 min   | P<0.05                    |
| <b>PC-2</b>                                                                          | Kruskal-Wallis One Way<br>ANOVA on Ranks                              |                                                             | P=<0.001                  |
|                                                                                      |                                                                       | PMNs +100 nM fMLP 1 min vs.<br>CTRL PMNs                    | P=0.860                   |
|                                                                                      | All Pairwise Multiple<br>Comparison<br>(Dunn's Method)                | WT-PMNs +100 nM fMLP 1 min vs.<br>CTRL PMNs                 | P<0.05                    |
|                                                                                      |                                                                       | PMNs +100 nM fMLP 1 min vs.<br>WT-PMNs +100 nM fMLP 1 min   | P<0.05                    |
| <b>Figure S2 CD (5 min fMLP stimulation), model 2 ( 1700-1480 cm<sup>-1</sup> )</b>  |                                                                       |                                                             |                           |
| <b>PC-1</b>                                                                          | Kruskal-Wallis One Way<br>ANOVA on Ranks                              |                                                             | P=<0.001                  |
|                                                                                      |                                                                       | PMNs +100 nM fMLP 5 min vs.<br>CTRL PMNs                    | P<0.05                    |
|                                                                                      | All Pairwise Multiple<br>Comparison<br>(Dunn's Method)                | WT-PMNs +100 nM fMLP 5 min vs.<br>CTRL PMNs                 | P<0.05                    |
|                                                                                      |                                                                       | PMNs +100 nM fMLP 5 min vs.<br>WT-PMNs +100 nM fMLP 5 min   | P<0.05                    |
| <b>PC-2</b>                                                                          | Kruskal-Wallis One Way<br>ANOVA on Ranks                              |                                                             | P=<0.001                  |
|                                                                                      |                                                                       | PMNs +100 nM fMLP 5 min vs.<br>CTRL PMNs                    | P<0.05                    |
|                                                                                      | All Pairwise Multiple<br>Comparison<br>(Dunn's Method)                | WT-PMNs +100 nM fMLP 5 min vs.<br>CTRL PMNs                 | P=0.498                   |
|                                                                                      |                                                                       | PMNs +100 nM fMLP 1 min vs.<br>WT-PMNs +100 nM fMLP 5 min   | P<0.05                    |
| <b>Figure S2 EF (10 min fMLP stimulation), model 2 ( 1700-1480 cm<sup>-1</sup> )</b> |                                                                       |                                                             |                           |
| <b>PC-1</b>                                                                          | Kruskal-Wallis One Way<br>ANOVA on Ranks                              |                                                             | P=<0.001                  |
|                                                                                      |                                                                       | PMNs +100 nM fMLP 10 min vs.<br>CTRL PMNs                   | P<0.05                    |
|                                                                                      | All Pairwise Multiple<br>Comparison<br>(Dunn's Method)                | WT-PMNs +100 nM fMLP 10 min vs.<br>CTRL PMNs                | P<0.05                    |
|                                                                                      |                                                                       | PMNs +100 nM fMLP 10 min vs.<br>WT-PMNs +100 nM fMLP 10 min | P<0.05                    |
| <b>PC-2</b>                                                                          | Kruskal-Wallis One Way<br>ANOVA                                       |                                                             | P=<0.001                  |
|                                                                                      |                                                                       | PMNs +100 nM fMLP 10 min vs.<br>CTRL PMNs                   | P<0.05                    |
|                                                                                      | All Pairwise Multiple<br>Comparison Procedures<br>(Holm-Sidak method) | WT-PMNs +100 nM fMLP 10 min vs.<br>CTRL PMNs                | P<0.05                    |
|                                                                                      |                                                                       | PMNs +100 nM fMLP 10 min vs.<br>WT-PMNs +100 nM fMLP 10 min | P<0.05                    |

Figure S5. Statistics performed on PCA data

| <b>Figure 4 AB, model 1 ( 1560-1485, 1190-1140, 985-874 cm-1 )</b> |                                                            |                       |                                          |
|--------------------------------------------------------------------|------------------------------------------------------------|-----------------------|------------------------------------------|
| <b>variables</b>                                                   | <b>Type of test</b>                                        | <b>comparison</b>     | <b>significance level:<br/>P&lt;0.05</b> |
| <b>PC-1</b>                                                        | t-test on tne means                                        | Ba/F3 PAR vs. Ba/F3WT | P=<0.001                                 |
| <b>PC-2</b>                                                        | Mann-Whitney Rank Sum Test                                 |                       | P=0.124                                  |
| <b>Figure 4 CD, model 2 ( 1560-1485, 1190-1140, 985-874 cm-1 )</b> |                                                            |                       |                                          |
|                                                                    | Kruskal-Wallis One Way ANOVA<br>on Ranks                   |                       | P=<0.001                                 |
| <b>PC-1</b>                                                        | All Pairwise Multiple<br>Comparison<br>(Dunn's Method)     | K562#MK vs. K562#DA   | P<0.05                                   |
|                                                                    |                                                            | K562#MK vs. K562#G1   | P<0.05                                   |
|                                                                    |                                                            | K562#G1 vs. K562#DA   | P<0.05                                   |
|                                                                    | Kruskal-Wallis One Way ANOVA<br>on Ranks                   |                       | P=0.238                                  |
| <b>PC-2</b>                                                        |                                                            | K562#MK vs. K562#DA   | P=0.538                                  |
|                                                                    | Mann-Whitney Rank Sum Test                                 | K562#MK vs. K562#G1   | P=0.054                                  |
|                                                                    |                                                            | K562#G1 vs. K562#DA   | P=0.706                                  |
| <b>Figure 4 EF, model 1 ( 1700-1480 cm-1 )</b>                     |                                                            |                       |                                          |
| <b>PC-1</b>                                                        | t-test on tne means                                        | Ba/F3 PAR vs. Ba/F3WT | P=<0.001                                 |
| <b>PC-2</b>                                                        | Mann-Whitney Rank Sum Test                                 |                       | P=0.329                                  |
| <b>Figure 4 GH, model 2 ( 1700-1480 cm<sup>-1</sup> )</b>          |                                                            |                       |                                          |
|                                                                    | Kruskal-Wallis One Way ANOVA<br>on Ranks                   |                       | P=<0.001                                 |
| <b>PC-1</b>                                                        | All Pairwise Multiple<br>Comparison<br>(Dunn's Method)     | K562#MK vs. K562#DA   | P<0.05                                   |
|                                                                    |                                                            | K562#MK vs. K562#G1   | P<0.05                                   |
|                                                                    |                                                            | K562#G1 vs. K562#DA   | P<0.05                                   |
|                                                                    | Kruskal-Wallis One Way ANOVA                               |                       | P=<0.001                                 |
| <b>PC-2</b>                                                        | All Pairwise Multiple<br>Comparison<br>(Holm-Sidak method) | K562#MK vs. K562#DA   | P=0.724                                  |
|                                                                    |                                                            | K562#MK vs. K562#G1   | P<0.05                                   |
|                                                                    |                                                            | K562#G1 vs. K562#DA   | P<0.05                                   |

Figure S5. Statistics performed on PCA data

| <b>Figure 5 AB, model 1 ( 1560-1485, 1190-1140, 985-874 cm<sup>-1</sup> )</b> |                                                        |                                           |                              |
|-------------------------------------------------------------------------------|--------------------------------------------------------|-------------------------------------------|------------------------------|
| variables                                                                     | Type of test                                           | comparison                                | significance level<br>P<0.05 |
| <b>PC-1</b>                                                                   | Kruskal-Wallis One Way<br>ANOVA on Ranks               |                                           | P=<0.001                     |
|                                                                               |                                                        | CTRL K562#MK vs. 1.0 μM IMA               | YES                          |
|                                                                               |                                                        | CTRL K562#MK vs. 2.0 μM ICD-Tat           | YES                          |
|                                                                               | All Pairwise Multiple<br>Comparison<br>(Dunn's Method) | CTRL K562#MK vs. 2.0 μM (D1028A)ICD-Tat   | YES                          |
|                                                                               |                                                        | 1.0 μM IMA vs. 2.0 μM (D1028A)ICD-Tat     | YES                          |
|                                                                               |                                                        | 1.0 μM IMA vs. 2.0 μM ICD-Tat             | NO                           |
|                                                                               |                                                        | 2.0 μM ICD-Tat vs. 2.0 μM (D1028A)ICD-Tat | YES                          |
| <b>PC-2</b>                                                                   | Kruskal-Wallis One Way<br>ANOVA on Ranks               |                                           | P=<0.001                     |
|                                                                               |                                                        | CTRL K562#MK vs. 1.0 μM IMA               | NO                           |
|                                                                               |                                                        | CTRL K562#MK vs. 2.0 μM ICD-Tat           | NO                           |
|                                                                               | All Pairwise Multiple<br>Comparison<br>(Dunn's Method) | CTRL K562#MK vs. 2.0 μM (D1028A)ICD-Tat   | YES                          |
|                                                                               |                                                        | 1.0 μM IMA vs. 2.0 μM (D1028A)ICD-Tat     | YES                          |
|                                                                               |                                                        | 1.0 μM IMA vs. 2.0 μM ICD-Tat             | NO                           |
|                                                                               |                                                        | 2.0 μM ICD-Tat vs. 2.0 μM (D1028A)ICD-Tat | YES                          |
| <b>Figure 5 CD, model 2 ( 1700-1480 cm<sup>-1</sup> )</b>                     |                                                        |                                           |                              |
| <b>PC-1</b>                                                                   | Kruskal-Wallis One Way<br>ANOVA on Ranks               |                                           | P=<0.001                     |
|                                                                               |                                                        | CTRL K562#MK vs. 1.0 μM IMA               | YES                          |
|                                                                               |                                                        | CTRL K562#MK vs. 2.0 μM ICD-Tat           | YES                          |
|                                                                               | All Pairwise Multiple<br>Comparison (Dunn's Method)    | CTRL K562#MK vs. 2.0 μM (D1028A)ICD-Tat   | YES                          |
|                                                                               |                                                        | 1.0 μM IMA vs. 2.0 μM (D1028A)ICD-Tat     | YES                          |
|                                                                               |                                                        | 1.0 μM IMA vs. 2.0 μM ICD-Tat             | NO                           |
|                                                                               |                                                        | 2.0 μM ICD-Tat vs. 2.0 μM (D1028A)ICD-Tat | YES                          |
| <b>PC-2</b>                                                                   | Kruskal-Wallis One Way<br>ANOVA on Ranks               |                                           | P=0.243                      |
|                                                                               |                                                        | CTRL K562#MK vs. 1.0 μM IMA               | NO                           |
|                                                                               |                                                        | CTRL K562#MK vs. 2.0 μM ICD-Tat           | NO                           |
|                                                                               | All Pairwise Multiple<br>Comparison (Dunn's Method)    | CTRL K562#MK vs. 2.0 μM (D1028A)ICD-Tat   | YES                          |
|                                                                               |                                                        | 1.0 μM IMA vs. 2.0 μM (D1028A)ICD-Tat     | YES                          |
|                                                                               |                                                        | 1.0 μM IMA vs. 2.0 μM ICD-Tat             | NO                           |
|                                                                               |                                                        | 2.0 μM ICD-Tat vs. 2.0 μM (D1028A)ICD-Tat | YES                          |

Figure S5. Statistics performed on PCA data

**Figure 6 AB, model 1 ( 1560-1485, 1190-1140, 985-874 cm<sup>-1</sup> )**

| variables                                                 | Type of test                                               | comparison                        | significance level<br>P<0.05 |
|-----------------------------------------------------------|------------------------------------------------------------|-----------------------------------|------------------------------|
| <b>PC-1</b>                                               | Kruskal-Wallis One Way<br>ANOVA                            | CTRL K562#G1 vs. CTRL K562#MK     | P=<0.001<br>YES              |
|                                                           |                                                            | CTRL K562#G1 vs. 0.5 μM IMA #G1   | YES                          |
|                                                           | All Pairwise Multiple<br>Comparison (Holm-Sidak<br>Method) | CTRL K562#G1 vs. 0.5 μM IMA #MK   | YES                          |
|                                                           |                                                            | CTRL K562#MK vs. 0.5 IMA μM #G1   | YES                          |
|                                                           |                                                            | CTRL K562#MK vs. 0.5 IMA μM #MK   | YES                          |
|                                                           |                                                            | 0.5 μM IMA #G1 vs. 0.5 μM IMA #MK | YES                          |
|                                                           |                                                            |                                   |                              |
| <b>PC-2</b>                                               | Kruskal-Wallis One Way<br>ANOVA on Ranks                   | CTRL K562#G1 vs. CTRL K562#MK     | P=<0.001<br>YES              |
|                                                           |                                                            | CTRL K562#G1 vs. 0.5 μM IMA #G1   | YES                          |
|                                                           | All Pairwise Multiple<br>Comparison<br>(Dunn's Method)     | CTRL K562#G1 vs. 0.5 μM IMA #MK   | YES                          |
|                                                           |                                                            | CTRL K562#MK vs. 0.5 IMA μM #G1   | YES                          |
|                                                           |                                                            | CTRL K562#MK vs. 0.5 IMA μM #MK   | YES                          |
|                                                           |                                                            | 0.5 μM IMA #G1 vs. 0.5 μM IMA #MK | YES                          |
|                                                           |                                                            |                                   |                              |
| <b>Figure 6 CD, model 2 ( 1700-1480 cm<sup>-1</sup> )</b> |                                                            |                                   |                              |
| <b>PC-1</b>                                               | Kruskal-Wallis One Way<br>ANOVA                            | CTRL K562#G1 vs. CTRL K562#MK     | P=<0.001<br>YES              |
|                                                           |                                                            | CTRL K562#G1 vs. 0.5 μM IMA #G1   | YES                          |
|                                                           | All Pairwise Multiple<br>Comparison<br>(Holm-Sidak Method) | CTRL K562#G1 vs. 0.5 μM IMA #MK   | YES                          |
|                                                           |                                                            | CTRL K562#MK vs. 0.5 IMA μM #G1   | YES                          |
|                                                           |                                                            | CTRL K562#MK vs. 0.5 IMA μM #MK   | YES                          |
|                                                           |                                                            | 0.5 μM IMA #G1 vs. 0.5 μM IMA #MK | YES                          |
|                                                           |                                                            |                                   |                              |
| <b>PC-2</b>                                               | Kruskal-Wallis One Way<br>ANOVA on Ranks                   | CTRL K562#G1 vs. CTRL K562#MK     | P=0.243<br>YES               |
|                                                           |                                                            | CTRL K562#G1 vs. 0.5 μM IMA #G1   | YES                          |
|                                                           | All Pairwise Multiple<br>Comparison<br>(Dunn's Method)     | CTRL K562#G1 vs. 0.5 μM IMA #MK   | YES                          |
|                                                           |                                                            | CTRL K562#MK vs. 0.5 IMA μM #G1   | YES                          |
|                                                           |                                                            | CTRL K562#MK vs. 0.5 IMA μM #MK   | YES                          |
|                                                           |                                                            | 0.5 μM IMA #G1 vs. 0.5 μM IMA #MK | YES                          |
|                                                           |                                                            |                                   |                              |

Figure S5. Statistics performed on PCA data

**S6 Figure 1 AB: model 1800-875  $\text{cm}^{-1}$**

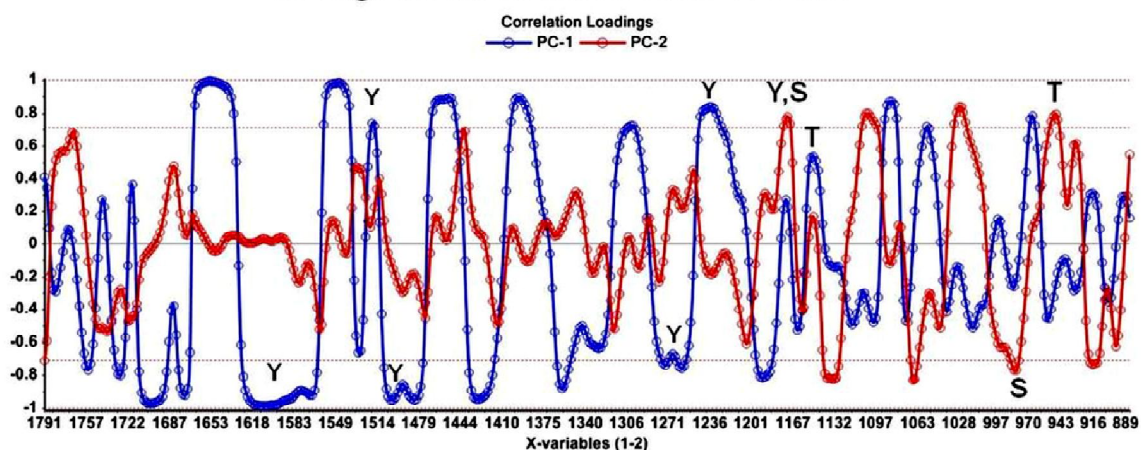

**S6 Figure 1 CD: model 1: 1560-1485, 1190-140, 985-875  $\text{cm}^{-1}$**

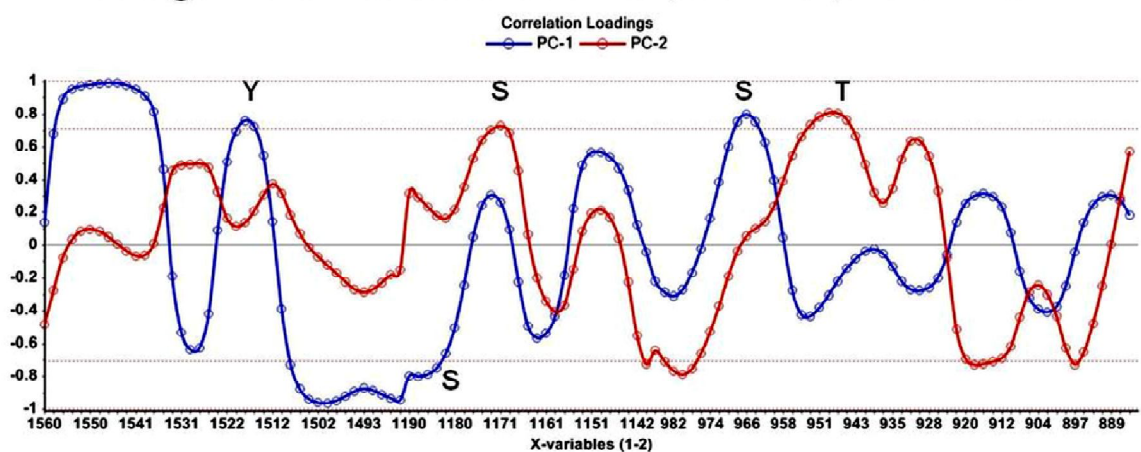

**S6 Figure 1 EF: model 2: 1700-1480  $\text{cm}^{-1}$**

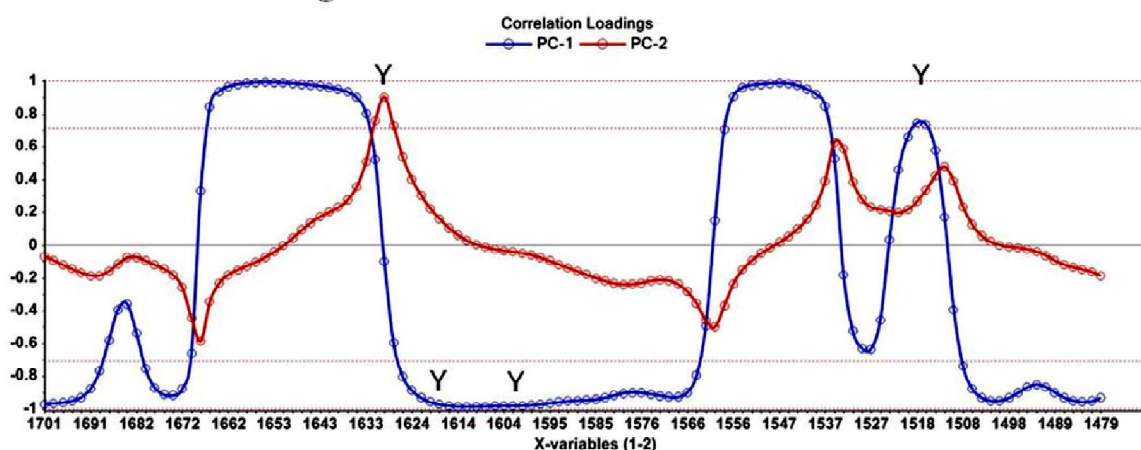

Figure S6. Correlation loadings of PCA in Figure 1 AB. The unsupervised identification of variables giving major contributions to the models. Values that lie within the upper and lower bounds of the plot are modelled by PCs. Those that lie between the two lower bounds are not. An attempt has been made to assign tyrosine (Y), serine (S), and threonine (T) according to the data available in the literature (Refs 43-48).
